# Supplementary material for: Excited-state photophysical processes in a molecular system containing perylene bisimide and zinc porphyrin chromophores
Source: Royal Society of Chemistry journal article supplement (doi:10.1039/d0cp02672g), 2020-01-01
Supplement: d0cp02672g1.pdf [file d0cp02672g1.pdf]

**Supporting Information for:**

**Excited-State Photophysical Processes in a Molecular System Containing  
Bisimide and Zinc Porphyrin Chromophores**

*Fan Yang<sup>†§\*</sup>, Yanzhou Wu<sup>†‡§</sup>, Juan Zhao<sup>†‡</sup>, Yiting Guo<sup>||‡</sup>, Xudong Guo<sup>&</sup>, Weiwei Li<sup>?</sup>,  
and Jianping Wang<sup>†‡\*</sup>*

*† Beijing National Laboratory for Molecular Sciences, Molecular Reaction Dynamics  
Laboratory, CAS Research/Education Center for Excellence in Molecular Sciences,  
Institute of Chemistry, Chinese Academy of Sciences, Beijing, 100190, P. R. China*

*|| Beijing National Laboratory for Molecular Sciences, Key Laboratory of Organic Solids,  
Institute of Chemistry, Chinese Academy of Sciences, Beijing, 100190 P. R. China*

*& Beijing National Laboratory for Molecular Sciences, Key Laboratory of Photochemistry,  
Institute of Chemistry, Chinese Academy of Sciences, Beijing, 100190, P. R. China*

*? Beijing Advanced Innovation Center for Soft Matter Science and Engineering & State  
Key Laboratory of Organic-Inorganic Composites, Beijing University of Chemical  
Technology, Beijing 100029, China*

*‡ University of Chinese Academy of Sciences, Beijing 100049, P. R. China*

*§ These authors contributed equally.*

*\* Author to whom correspondences should be addressed.*

Tel: (+86)-010-62656806; Fax: (+86)-010-62563167; E-mail: yangfan@iccas.ac.cn;  
jwang@iccas.ac.cn.

## Table of Contents

|                                                                                        |    |
|----------------------------------------------------------------------------------------|----|
| The concentration dependence of PDI-ZnPor-PDI solution .....                           | S3 |
| C=O stretching mode assignment .....                                                   | S3 |
| Fitting parameters of fs-IR spectra in PDI-ZnPor-PDI film .....                        | S4 |
| Calculated IR spectra of the radical anion and excited state.....                      | S5 |
| FTIR spectra and dynamics of PDI-ZnPor-PDI solution at several<br>concentrations ..... | S6 |

### The concentration dependence of PDI-ZnPor-PDI solution

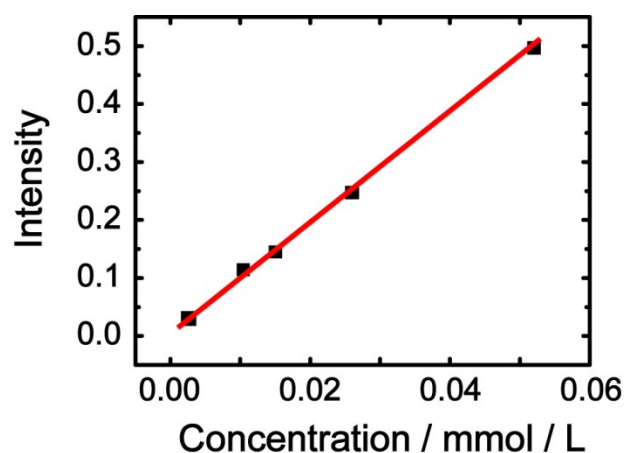

**Fig. S1.** Intensity of the charge transfer band probed at 748 nm in the UV-visible spectra as a function of concentration in PDI-ZnPor-PDI solution. A linear relationship is shown in red line.

### C=O stretching mode assignment

The calculated PDI frequency spectrum was used to assign the IR modes of C=O groups in the experimental FTIR spectrum. The calculated frequency spectrum in the implicit solvent ( $\text{CHCl}_3$ ) was obtained using the polarizable continuum model.

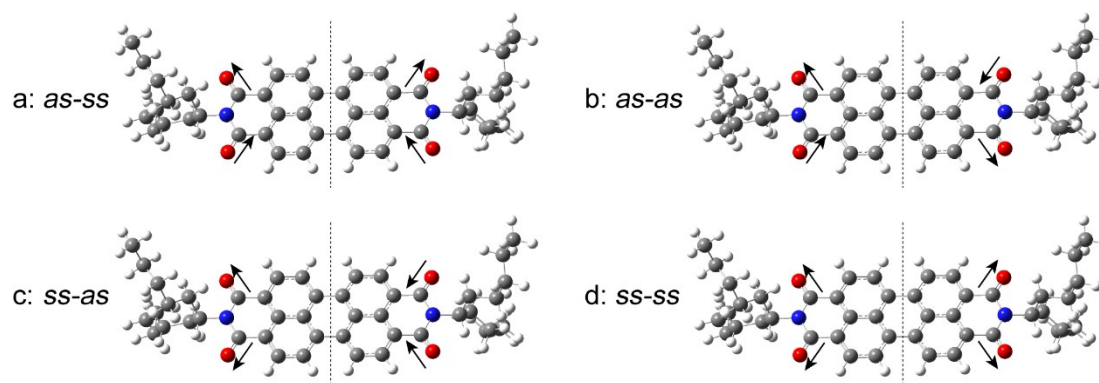

**Fig. S2.** Calculated asymmetric stretching (*as*, top) and symmetric stretching (*ss*) of four C=O groups of PDI monomer in the implicit solvent ( $\text{CHCl}_3$ ). Mode a (*as-ss*) and mode c (*ss-as*) are strongly IR active while mode b (*as-as*) and mode d (*ss-ss*) are weakly IR active (see Table S1).

**Table S1.** Calculated vibrational transition frequency ( $\omega$ ) and intensity ( $I$ ) of the *ss* and *as* C=O stretching vibrational modes of PDI monomer in the implicit solvent ( $\text{CHCl}_3$ ).

| Case | Mode         | $\omega / \text{cm}^{-1}$ | $I / \text{km/mol}$ |
|------|--------------|---------------------------|---------------------|
| a    | <i>as-ss</i> | 1653.8                    | 1228.5              |
| b    | <i>as-as</i> | 1654.2                    | 0.6                 |
| c    | <i>ss-as</i> | 1692.3                    | 1321.9              |
| d    | <i>ss-ss</i> | 1697.0                    | 0.1                 |

**Fitting parameters of fs-IR spectra in PDI-ZnPor-PDI film**

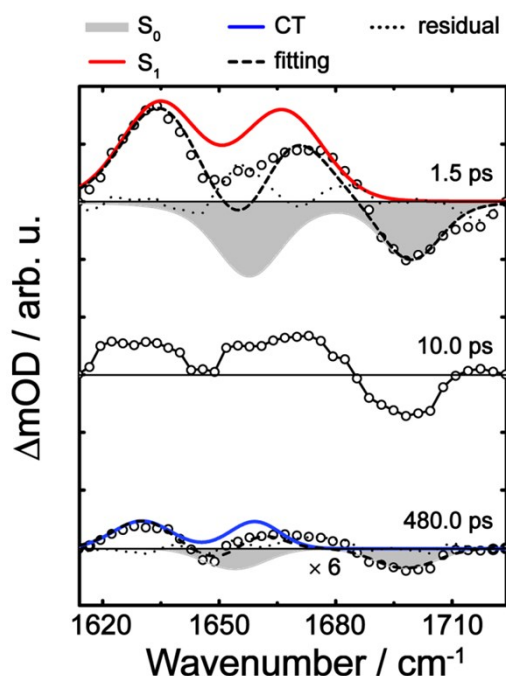

**Fig. S3.** Fs-IR spectra (circle) and their fittings (dash lines) at three representative delay times. The IR components for the vibrational bleaching feature of the electronic ground state ( $S_0$ , gray region), and for the vibrational absorption of the electronic excited singlet state ( $S_1$ , red line) and charge transfer state (blue line) were obtained by spectral fitting.

**Table S2.** Fitting parameters of the fs-IR spectra (Fig. 2b) in the PDI-ZnPor-PDI film excited at 530 nm.

| Peak | $S_1 / \text{cm}^{-1}$ | FWHM / $\text{cm}^{-1}$ | CT / $\text{cm}^{-1}$ | FWHM / $\text{cm}^{-1}$ |
|------|------------------------|-------------------------|-----------------------|-------------------------|
|      |                        |                         | 1                     |                         |
| 1    | 1666.5                 | 24.1                    | 1658.6                | 14.7                    |
| 2    | 1634.8                 | 23.6                    | 1630.1                | 16.1                    |



## Calculated IR spectra of the radical anion and excited state

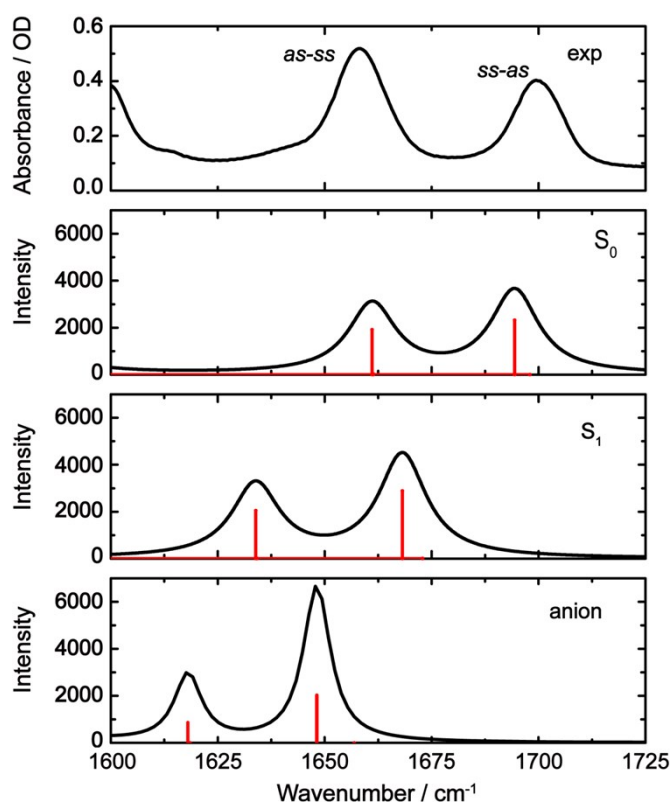

**Fig. S4.** Calculated IR spectra of the ground state ( $S_0$ ), excited singlet state ( $S_1$ ) and the radical anion for the PDI monomer in gas phase. Experimental IR spectrum is also given for comparison.

The computed IR spectra of the ground state, excited singlet state and the radical anion in PDI monomer in the frequency range of 1600-1725  $\text{cm}^{-1}$  are given in Fig. S3. Moreover, the detailed vibrational frequency and the transition intensity of the C=O stretching modes corresponding to excited state are listed in Table S3. The calculated results suggest that the C=O stretching modes are distinguishable from the singlet state and radical anion, and can be used as signatures to explore the photophysical progress in PDI-ZnPor-PDI system.

**Table S3.** The calculated frequency ( $\omega$ ) and transition intensity ( $I$ ) of the C=O stretching modes.

|                | $\omega$ (cm <sup>-1</sup> ) | $I$ (km/mol) | Mode         |
|----------------|------------------------------|--------------|--------------|
| S <sub>0</sub> | 1661.1                       | 639.7        | <i>as-ss</i> |
|                | 1694.4                       | 776.9        | <i>ss-as</i> |
| S <sub>1</sub> | 1633.9                       | 683.3        | <i>as-ss</i> |
|                | 1668.2                       | 963.3        | <i>ss-as</i> |
| anion          | 1618.0                       | 867.1        | <i>as-ss</i> |
|                | 1648.2                       | 2022.8       | <i>ss-as</i> |

**FTIR spectra and dynamics of PDI-ZnPor-PDI solution at several concentrations**

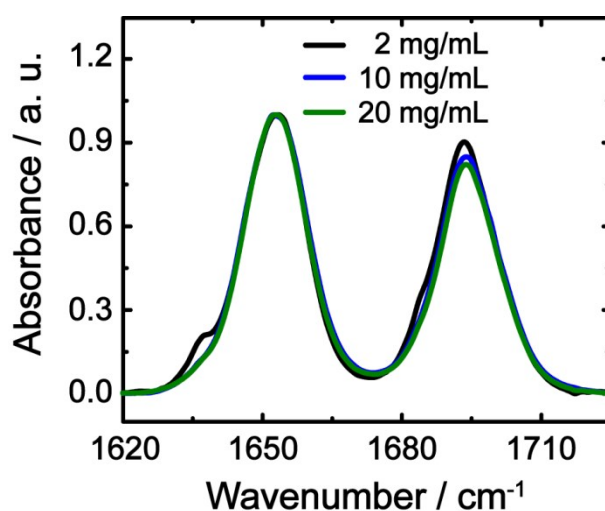

**Fig. S5.** Intensity normalized steady-state IR spectrum of PDI-ZnPor-PDI solutions at three concentrations (2 mg/mL, 10 mg/mL and 20 mg/mL).

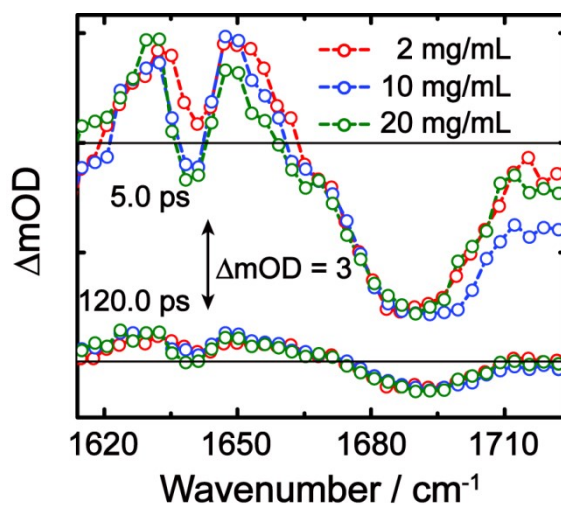

**Fig. S6.** Normalized fs-IR spectra measured at three different concentrations of PDI-

ZnPor-PDI solutions (2 mg/mL, 10 mg/mL and 20 mg/mL) at typical delay times (circles connected by dashed lines, 5.0 ps and 120.0 ps, vertically displaced).

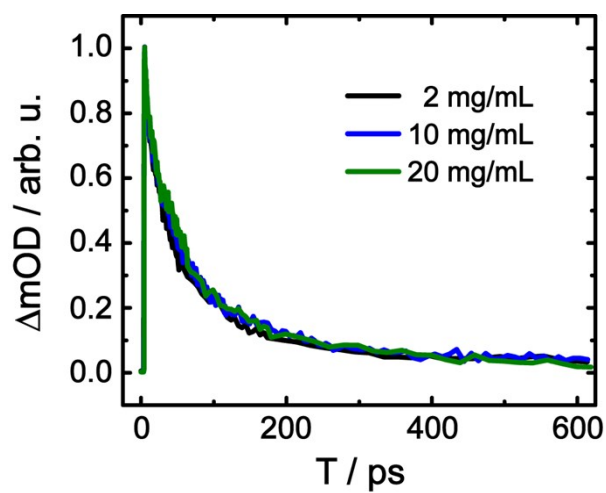

**Fig. S7.** Intensity normalized kinetic traces probe at  $1625\text{ cm}^{-1}$  of PDI-ZnPor-PDI solutions at three different concentrations (2 mg/mL, 10 mg/mL and 20 mg/mL).
